# Supplementary material for: Doxorubicin resistant cancer cells activate myeloid-derived suppressor cells by releasing PGE2
Source: PubMed Central journal article supplement (PMC4817121; doi:10.1038/srep23824), 2016-04-01
Supplement: srep23824-s1.pdf [file srep23824-s1.pdf]

## **Supporting information**

### **Doxorubicin resistant cancer cells activate myeloid-derived suppressor cells by releasing PGE<sub>2</sub>**

Yuan Rong<sup>1</sup>, Chun-Hui Yuan<sup>2</sup>, Zhen Qu<sup>2</sup>, Hu Zhou<sup>1</sup>, Qing Guan<sup>2</sup>, Na Yang<sup>1</sup>, Xiao-Hua Leng<sup>3</sup>, Lang Bu<sup>4</sup>, Ke Wu<sup>5</sup>, Fu-Bing Wang<sup>1\*</sup>

<sup>1</sup> Department of Laboratory Medicine & Center for Gene Diagnosis, Zhongnan Hospital of Wuhan University, No. 169 Donghu Road, Wuchang District, Wuhan 430071, P.R. China

<sup>2</sup> Department of Immunology, School of Basic Medical Sciences, Wuhan University, No. 185 Donghu Road, Wuchang District, Wuhan 430071, P.R. China

<sup>3</sup> Hubei Key Laboratory of Tumor Biological Behaviors & Hubei Cancer Clinical Study Center, Zhongnan Hospital of Wuhan University, No. 169 Donghu Road, Wuchang District, Wuhan 430071, P.R. China

<sup>4</sup> Department of Pathophysiology, School of Basic Medical Sciences, Wuhan University, No. 185 Donghu Road, Wuchang District, Wuhan 430071, P.R. China

<sup>5</sup> Animal experiment center of wuhan university/Animal Biosafety Level-III laboratory, No. 115 Donghu Road, Wuchang District, Wuhan 430071, P.R. China

\*Corresponding author: Fu-Bing Wang\*, M.D., Ph.D., Department of Laboratory Medicine, Zhongnan Hospital of Wuhan University, No. 169 Donghu Road, Wuchang District, Wuhan 430071, P.R. China. Tel: +86-27-67813517; Fax: +86-27-67813128; Email address: wfb20042002@sina.com

**Supplementary Table S1. Primers used for Real-time PCR**

| <b>Gene name</b> | <b>Forward primer</b>    | <b>Reverse primer</b>    |
|------------------|--------------------------|--------------------------|
| NOS2             | CCAAGCCCTCACCTACTTCC     | CTCTGAGGGCTGACACAAGG     |
| Arg-1            | CTCCAAGCCAAAGTCCTTAGAG   | AGGAGCTGTCATTAGGGACATC   |
| GAPDH            | AGGTCATCCCAGAGCTGAACG    | ACCCTGTTGCTGTAGCCGTAT    |
| $\beta$ -Actin   | ACGGCCAGGTCATCACTATTC    | AGGAAGGCTGGAAAAGAGCC     |
| TNF- $\alpha$    | TCTATGGCCCAGACCCTCAC     | GACGGCAGAGAGGAGGTTGA     |
| COX2             | TGAGTACCGCAAACGCTTCT     | CTCCCCAAAGATAGCATCTGG    |
| MMP9             | TGAGCTGGACAGCCAGACACTAAA | TCGCGGCAAGTCTTCAGAGTAGTT |

## Supplementary Figures

### Supplementary Figure S1

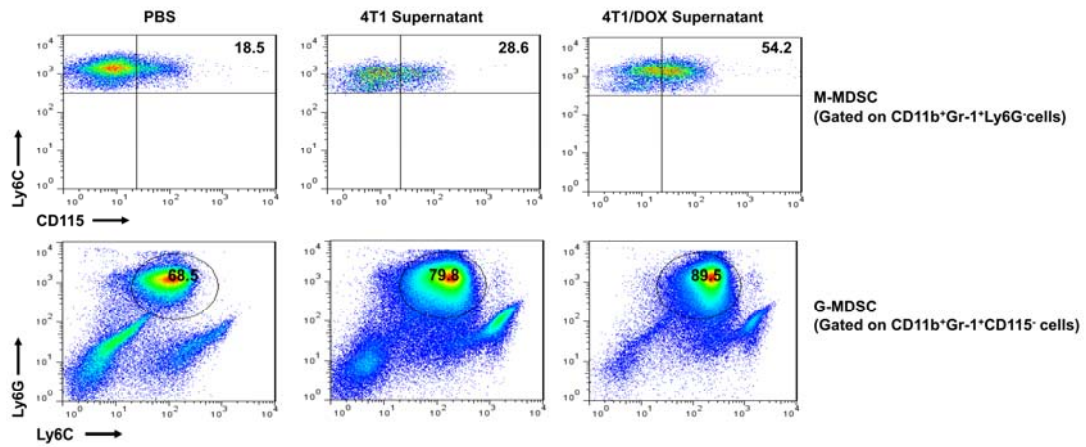

**Supplementary Figure S1.** Bone marrow (BM) cells were cultured with PBS or conditioned medium from 4T1 or Doxorubicin-resistant 4T1 cells (4T1/DOX) for 4 days in the presence of GM-CSF and IL-6, the frequency of M-MDSCs and G-MDSCs in the BM cells was analyzed by flowcytometry.

**Supplementary Figure S2**

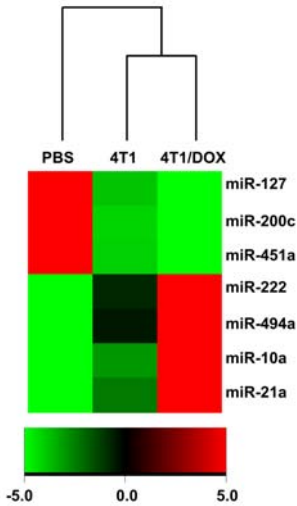

**Supplementary Figure S2.** MicroRNA expression profiles in MDSCs treated by PBS, Supernatant from 4T1 or 4T1/DOX.

### Supplementary Figure S3

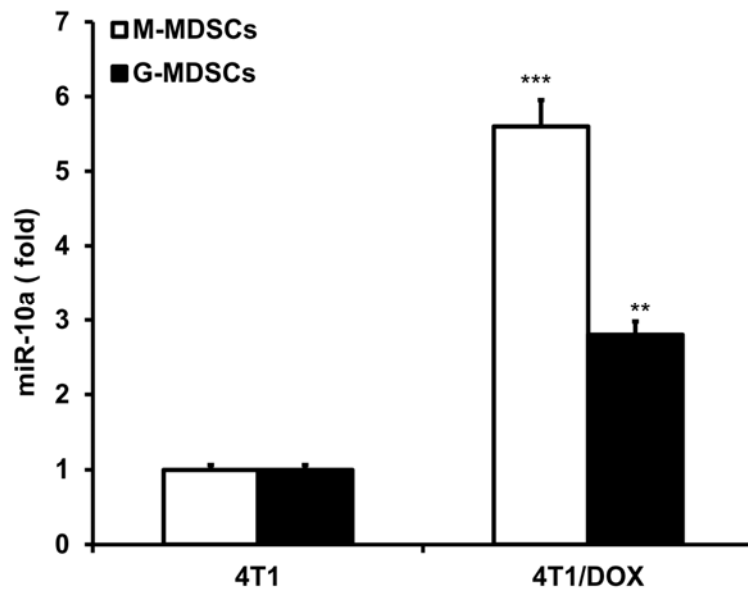

**Supplementary Figure S3.** BM cells were cultured with 4T1 cells and 4T1/DOX cells-derived conditioned medium; in the presence of GM-CSF and IL-6 for 24 h, and the expression of miR-10a in M-MDSCs or G-MDSCs was measured by qRT-PCR. The data represent Mean  $\pm$  SD, (n=5). \*\*  $p < 0.01$ , \*\*\*  $p < 0.0001$ .

**Supplementary Figure S4**

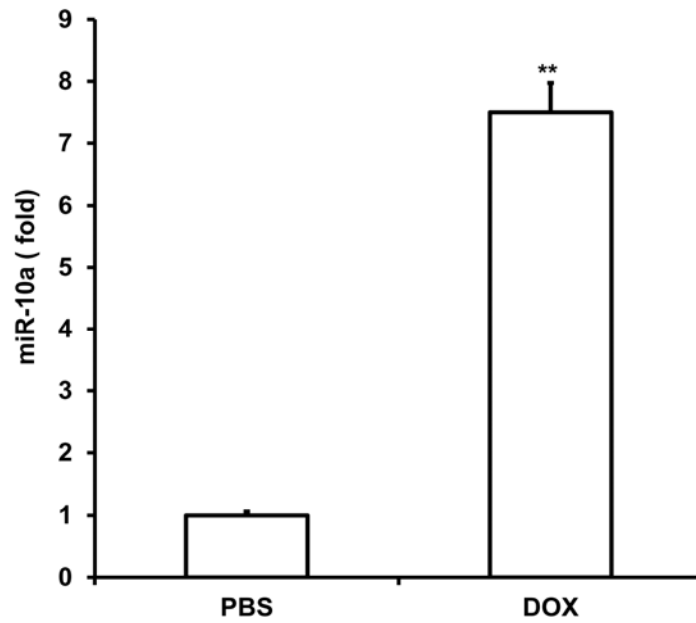

**Supplementary Figure S4.** The expression of miR-10a in MDSCs sorted from tumor xenograft of 4T1 tumor bearing mice receiving repeated injections of doxorubicin (5mg/kg) or PBS was analyzed by qRT-PCR. The data represent Mean  $\pm$  SD, (n=5). \*\*  $p < 0.01$ .
